# Supplementary material
Source: PubMed Central journal article supplement (PMC2920144)

## Supplemental information

### MLL-rearranged B Lymphoblastic Leukemias Selectively Express the Immunoregulatory Carbohydrate-binding Protein, Galectin-1

Running title: Galectin-1 overexpression in MLL ALL

Przemyslaw Juszczynski<sup>1,8</sup>, Scott J. Rodig<sup>2,8</sup>, Jing Ouyang<sup>1</sup>, Evan O'Donnell<sup>1</sup>, Kunihiro Takeyama<sup>1</sup>, Wojciech Mlynarski<sup>3</sup>, Katarzyna Mycko<sup>3</sup>, Tomasz Szczepanski<sup>4</sup>, Anna Gaworczyk<sup>5</sup>, Andrei Krivtsov<sup>6</sup>, Joerg Faber<sup>6</sup>, Amit U. Sinha<sup>6</sup>, Gabriel A. Rabinovich<sup>7</sup>, Scott A. Armstrong<sup>6</sup>, Jeffery L. Kutok<sup>2</sup> and Margaret A. Shipp<sup>1</sup>

<sup>1</sup> Department of Medical Oncology, Dana-Farber Cancer Institute, Boston, MA; <sup>2</sup> Department of Pathology, Brigham & Women's Hospital, Boston, MA; <sup>3</sup> Department of Pediatrics, Hematology, Oncology & Diabetology, Medical University of Lodz, Poland; <sup>4</sup> Department of Pediatric Hematology and Oncology, Medical University of Silesia, Zabrze, Poland; <sup>5</sup> Department of Pediatric Hematology and Oncology, Medical University of Lublin, Poland; <sup>6</sup> Department of Pediatric Oncology, Children's Hospital, Boston, MA; <sup>7</sup> Laboratory of Immunopathology, Institute of Biology and Experimental Medicine, CONICET, Buenos Aires, Argentina; <sup>8</sup> These authors contributed equally

Corresponding authors: Jeffery L. Kutok , Brigham and Women's Hospital, 75 Francis Street, Boston, MA, 02115 phone 617-732-5714, Fax 617-264-5169, e-mail [jkutok@partners.org](mailto:jkutok@partners.org); Margaret A. Shipp, Dana-Farber Cancer Institute, 44 Binney Street, Boston, MA 02115, phone 617-632-3874, Fax 617-632-4734, e-mail [margaret\\_shipp@dfci.harvard.edu](mailto:margaret_shipp@dfci.harvard.edu)

Expression of Gal-1 in two independent series of transcriptionally profiled primary B-ALLs with known MLL translocation status (Armstrong et al, 2002, Nat Genet. 2002; 30: 41-47; Yeoh et al, Cancer Cell. 2002; 1: 133-143)

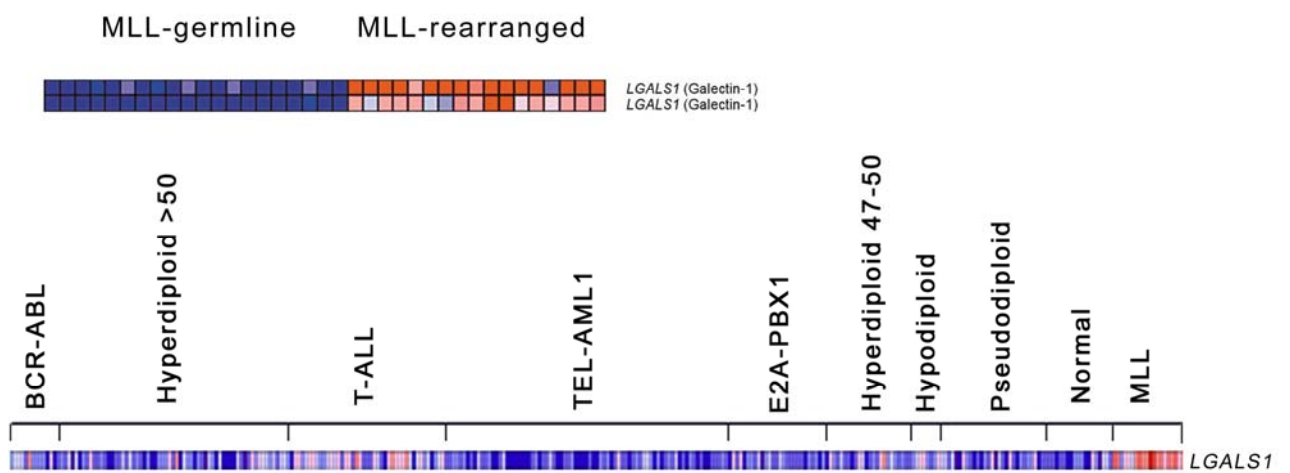

Supplement: NIHMS218380-supplement.pdf [file NIHMS218380-supplement.pdf]
